**Running Head:** DNA metabarcoding of degraded wolf scats

## **Comparison of mechanical sorting and DNA metabarcoding for diet analysis with degraded wolf scats**

Aimee Massey<sup>1</sup>, Gretchen Roffler<sup>2</sup>, Tessa Vermeul<sup>1</sup>, Jennifer Allen<sup>1</sup>, Taal Levi<sup>1</sup>

<sup>1</sup>Department of Fisheries and Wildlife, Oregon State University, Corvallis, OR 97331, USA

<sup>2</sup>Alaska Department of Fish and Game, Division of Wildlife Conservation, P.O. Box 110024, Juneau, Alaska 99811 USA

**Corresponding author email:** [aimeemassey@gmail.com](mailto:aimeemassey@gmail.com) , **Tel:** 207-314-7151

## 1 **Abstract**

2 DNA metabarcoding has become a powerful technique for identifying species and  
3 profiling biodiversity with the potential to improve efficiency, reveal rare prey species, and  
4 correct mistaken identification error in diet studies. However, the extent to which molecular  
5 approaches agree with traditional approaches is unknown for many species. Here, we compare  
6 diets from wolf scats profiled using both mechanical sorting and metabarcoding of amplified  
7 vertebrate DNA sequences. Our objectives were: (1) compare findings from mechanical sorting  
8 and metabarcoding as a method of diet profiling and (2) use results to better understand diets of  
9 wolves on Prince of Wales Island, a population of conservation concern. We predicted  
10 metabarcoding would reveal both higher diversity of prey and identify rare species that are  
11 overlooked with mechanical sorting. We also posited that the relative contribution of Sitka black-  
12 tailed deer (*Odocoileus hemionus sitkensis*) and beaver (*Castor canadensis*) would be  
13 overestimated with mechanical sorting methods because of the failure to account for the full diet  
14 diversity of these wolves. We found that there was substantial overlap in the diets revealed using  
15 both methods, indicating that deer, beaver, and black bear (*Ursus americanus*) were the primary  
16 prey species. However, there was a large discrepancy in the occurrence of beaver in scats (54%  
17 and 24% from mechanical sorting and metabarcoding, respectively) explained by the high rate of  
18 false positives with mechanical sorting methods. Metabarcoding revealed more diet diversity  
19 than mechanical sorting, thus supporting our initial predictions. Prince of Wales Island wolves  
20 appear to have a more diverse diet with greater occurrence of rare species than previously  
21 described including 14 prey species that contribute to wolf diet. Metabarcoding is an effective  
22 method for profiling carnivore diet and enhances our knowledge concerning the full diversity of  
23 wolf diets, even in the extremely wet conditions of southeast Alaska, which can lead to DNA

24 degradation. Given the increasingly efficient and cost-effective nature of collecting eDNA, we  
25 recommend incorporating these molecular methods into field-based projects to further examine  
26 questions related to increased use of alternate prey coinciding with changes in abundance of  
27 primary prey and habitat alteration.

28

29 **Keywords:** *Canis lupus*, eDNA, noninvasive sampling, temperate rainforest, Prince of Wales  
30 Island, Alaska, metabarcoding, diets, wolves, scats

31

## 32 **Introduction**

33 Animal scats are a vital tool for answering scientific questions related to animal behavior,  
34 diet, and species interactions. Traditionally, scat-based diet analysis has relied upon the  
35 mechanical processing and sorting of scat remains. This typically includes processing a scat to  
36 remove fecal material followed by meticulous sorting and identification of remaining hair and  
37 hard parts. However, diet analysis with mechanical sorting of scats has well-known biases (Lake  
38 et al. 2003); rare species or species that lack non-digestible hard parts are often overlooked or  
39 misidentified. In addition, some species are challenging to distinguish based on bone fragments  
40 or hair samples leading to additional misidentification. This is often the case for large mammals  
41 that consume prey tissue rather than whole individuals such that diagnostic hard parts like teeth  
42 and bones are frequently absent in scats. Metabarcoding of fecal DNA presents a new alternative  
43 method for diet analysis (Shehzad et al. 2012, De Barba et al. 2014, Kartzinel et al. 2015,  
44 McInnes et al. 2017, Eriksson et al. 2019). The DNA metabarcoding workflow includes  
45 extracting DNA from environmental samples, DNA amplification using ‘universal’ primers  
46 (Binladen et al. 2007), and mass-parallel sequencing of amplified product using next generation

47 sequencing technologies. This process allows DNA barcodes from multiple species in a bulk  
48 sample to be sequenced simultaneously for an efficient and thorough profile of species present  
49 within an environmental sample (Valentini et al. 2009).

50         The utility of metabarcoding for informing important management objectives, where  
51 accurate taxonomic assignment and detection is paramount, is uncertain because unlike  
52 mechanical sorting (1) it is unknown how quality of inference from metabarcoding depends on  
53 acquiring relatively fresh scats with minimally degraded DNA, which can be challenging for rare  
54 taxa, and (2) it is not yet clear if the relative read abundance from metabarcoding can yield  
55 quantitative information that approximates the volume or biomass arising from each prey  
56 species. The degree to which relative read abundance (RRA) from DNA metabarcoding is  
57 correlated with the relative biomass of each prey species is a subject of substantial debate  
58 (Deagle et al. 2018, Pinol et al. 2018). Limited empirical research validating RRA against  
59 estimated biomass or volume from mechanical sorting informs this debate (Soininen et al. 2009,  
60 Thomas et al. 2017), although no studies have done so with terrestrial carnivores. Pinol et al.  
61 (2018) argued that metabarcoding results can only be interpreted quantitatively if amplification  
62 of DNA through PCR with universal primers is avoided because different amplification  
63 efficiencies among species can lead to poor representation of original biomass proportions.  
64 While this is often true for invertebrates, for which primer mismatch is common (Kreherwinkel  
65 et al. 2017), our 12S mtDNA primers rarely contains basepair mismatches for vertebrates and  
66 contain no mismatches for the taxa considered here (Appendix S1: Fig. S1). In addition, recent  
67 evidence suggests that as long as primer efficiency is high (no mismatches), the proportion of  
68 sequences arising from each species in metabarcoding (RRA) can produce semi-quantitative  
69 results (Kartzinel et al. 2015, Thomas et al. 2016, Kreherwinkel et al. 2017, Deagle et al. 2018).

70 This could allow metabarcoding to approximate relative biomass or volume information similar  
71 to that produced by mechanical sorting of hard parts as well as frequency of occurrence  
72 (proportion of scats that contain each species). Nevertheless, the degree to which degraded scats  
73 yield suitable inference comparable to mechanical sorting is not currently well-understood  
74 because of a lack of formal comparisons between metabarcoding and mechanical sorting (Deagle  
75 et al. 2018, Pinol et al. 2018).

76 To provide this methods comparison, we focused on the Alexander Archipelago wolf  
77 (*Canis lupus ligoni*) as a case-study. The Alexander Archipelago wolf has been repeatedly  
78 petitioned for listing as threatened under the U.S. Endangered Species Act (ESA). These wolves  
79 occur in relative geographic isolation in southeast Alaska, where continued pressure from habitat  
80 loss, population decline of their primary prey, and wolf harvesting have raised concern about the  
81 future of the population. Wolf population estimates at regional scales in southeast Alaska have  
82 been based on expected Sitka black-tailed deer (*Odocoileus hemionus sitkensis*) abundance under  
83 the assumption that wolves are closely tied to the abundance of their primary prey. This is  
84 evident in the most recent ESA species status review where deer habitat quality metrics were  
85 used to project wolf abundance (U.S. Fish and Wildlife Service 2015).

86 The wolves on Prince of Wales Island (POW) (Fig. 1) were of particular concern in the  
87 most recent assessment (2015) because in addition to high levels of wolf harvest, POW has the  
88 highest rate of old-growth logging in southeast Alaska (Albert and Schoen 2013, Person and  
89 Brinkman 2017). Deer populations are predicted to decline as old-growth forests with palatable  
90 understory forbs and shrubs are converted into dense, even-aged, closed canopy forests (Alaback  
91 1982, Schoen et al. 1988, Person et al. 1996, Farmer and Kirchhoff 2007, Gilbert et al. 2016,  
92 Person and Brinkman 2017, Porter 2018) that are strongly avoided by deer (Wallmo and Schoen

93 1980, Kohira and Rexstad 1997, Gilbert et al. 2017). Deer were the most frequently occurring  
94 prey species for the Alexander Archipelago wolf based on previous research conducted on POW  
95 (Kohira 1995, Person et al. 1996, Kohira and Rexstad 1997). However, mechanical sorting of  
96 wolf scats has revealed other prey in significant quantities (Kohira 1995), and coastal wolves in  
97 this region can consume substantial quantities of salmon seasonally and other marine resources  
98 (Szepanski et al. 1999, Darimont et al. 2003, 2004, 2008a, Lafferty et al. 2014), suggesting that  
99 wolf population abundance may also be dictated by the availability of prey other than deer.  
100 Consequently, refining knowledge regarding the diet of wolves in the system has important  
101 implications for wolf management, potential ESA considerations, and forest management in  
102 southeast Alaska.

103         Here we provide the first formal comparison of carnivore diet analysis from mechanical  
104 sorting and DNA metabarcoding using opportunistically collected scats across an assumed  
105 degradation spectrum in a temperate rainforest which is hostile to DNA preservation. We  
106 examined whether metabarcoding revealed a more diverse wolf diet than mechanical sorting,  
107 achieved increased taxonomic precision, and identified infrequently consumed prey species. We  
108 included both scats appearing highly degraded and those appearing fresh and assessed whether  
109 age of scats or biases introduced during the molecular processing affected the diet profile shown  
110 by metabarcoding. We additionally analyzed in detail Alexander Archipelago wolf diets with a  
111 particular focus on Prince of Wales Island to determine the prey profile of wolves and their  
112 dependence on deer.

113

## 114 **Materials and Methods**

### 115 *Study area and field collection*

116 Southeast Alaska lies within the Alexander Archipelago composed of over 2,000 named  
117 islands (Fig. 1) (Cook et al. 2006). This region receives between 130 – 400 cm of precipitation  
118 annually (Shanley et al. 2015) thus making it particularly inhospitable to the preservation of  
119 DNA in exposed environmental samples. The mainland is buttressed by the rugged Coast  
120 Mountains and extensive temperate rainforests at lower elevations. As a result of natural  
121 fragmentation and isolation, the North Pacific coast region supports many endemic plant and  
122 animal lineages, particularly on Prince of Wales Island, the largest island in the archipelago  
123 (Cook et al. 2006, MacDonald and Cook 2007, Smith 2016). Most of the forested area is within  
124 the Tongass National Forest managed by the U.S. Forest Service. This ecosystem hosts a  
125 diversity of mammals including iconic species such as Sitka black-tailed deer (*Odocoileus*  
126 *hemionus sitkensis*), American black bear (*Ursus americanus*), North American beaver (*Castor*  
127 *canadensis*), American marten (*Martes americanus*), mountain goat (*Oreamnos americanus*),  
128 Steller sea lion (*Eumetopias jubatus*), harbor seal (*Phoca vitulina*), and moose (*Alces alces*).  
129 Species distribution and assemblages vary among island and mainland areas of this region.

130 We collected wolf scats along wolf travel routes, near den sites, and on secondary roads  
131 during planned scat collection surveys during October 2014 - December 2015 (Fig. 1). We  
132 collected wolf scats primarily on Prince of Wales Island (55° 46'45.9480" N; 132° 49' 4.7748"  
133 W) (n = 145), but also opportunistically collected samples in other mainland and island systems  
134 (n = 38). We estimated the age (fresh [ $<3$  months] and old [ $>3$  months]) of scat based on  
135 appearance, time since last site visit (Ciucci et al. 1996), and exposure time considering that scats  
136 decompose rapidly in rainforest environments (Wallmo et al. 1962, Ciucci et al. 1996, Darimont  
137 et al. 2008b) (Fig. 2). Collected wolf scats were stored in plastic bags, labeled with location,

138 date, and perceived age of scat, and then frozen (-20°C). Frozen scats were shipped to Oregon  
139 State University for sample preparation and analysis.

140

#### 141 Mechanical sorting

142 We stored a subsample of each scat for later molecular analysis (sterilized forceps and  
143 razors were used to collect a sample from the middle section of each scat to minimize wolf DNA  
144 (Stenglein et al. 2010)), and then placed each scat in a mesh bag (1/8”) and soaked it in water for  
145 48 hours in a mason jar. We power-washed the scat to remove as much remaining fecal matter as  
146 possible. The remaining contents (i.e., hair, bones, other hard parts) were put in a labeled paper  
147 bag and dried in an oven (at approximately 50°C) for at least five days. We weighed the  
148 processed scat material (hair, bone, scale, feather, etc.) and mechanically homogenized and  
149 sorted the remains by hand. On average, the fine-scale sorting took 3.6 hours per scat. We  
150 examined hairs under a microscope and compared to hair samples from the Alaska Fur ID  
151 project (Carrlee and Horelick 2011). We made slide mounts using clear nail polish to examine  
152 scale pattern and medulla diameter in order to identify species. Following identification, the slide  
153 was labeled with the species name and sample of origin. This exhaustive, fine-scale sorting (Fig.  
154 3) ensured that even rare species could be identified. Along with species identification, we  
155 estimated the volume of each prey species as a proportion of estimated hard parts for a species in  
156 relation to all hard parts in an individual scat.

157

#### 158 Molecular analysis

159 Using the stored subsamples from each scat, we extracted DNA from each sample using  
160 the Qiagen DNeasy Blood and Tissue kit (Qiagen, Hilden, Germany) with slight modifications as



161 follows: 500 ul Buffer ATL, 50 ul Proteinase K, and 1.0 mm Zirconia/Silica beads (BioSpec  
162 Products, Bartlesville, OK) were added to the 1.7 ml tube containing the scat. Samples were  
163 vortexed for 10 minutes at maximum speed prior to incubation at 56°C for 4-6 hours. The DNA  
164 was eluted in a total volume of 100 ul. A negative control was extracted with each round  
165 (approximately 17 samples) of DNA extraction to identify possible cross contamination.

166 Following DNA extraction, each sample was amplified in three separate reactions using  
167 the primer pair 12SV5F/12SV5R (Riaz et al. 2011). We used the forward primer  
168 (TTAGATACCCCACTATGC) as Riaz et al. (2011) but modified the first base pair of the  
169 reverse primer (YAGAACAGGCTCCTCTAG) to allow broader binding of vertebrate targets.  
170 These primers target approximately 100 base pairs in the 12S region of the vertebrate  
171 mitochondrial genome. The initial PCR was carried out using AmpliTaq Gold 360 Master Mix  
172 (Life Technologies, Carlsbad, CA). To label samples for multiplexing, we used 384 unique 8 bp  
173 dual matching indexes on the forward and reverse primers to eliminate contamination due to tag  
174 jumping by filtering reads that did not have identical indexes, and we included 3 bp of random  
175 nucleotides on the 5' end to increase sequence diversity and prevent degradation of indexes  
176 during subsequent blunt-ending and ligation steps. PCR reactions were carried out in a volume of  
177 20 ul with 10 ul AmpliTaq Gold 360 Master Mix for a final concentration of 1x, 5 ul of forward  
178 and reverse primers for a final concentration of 0.25 uM, 3 ul of water, and 2 ul of DNA  
179 template. PCR cycling included initial denaturing at 95°C for 10 minutes, followed by 40 cycles  
180 of 95°C for 30 seconds, 58°C for 30 seconds, and 72°C for 30 seconds, with a final extension at  
181 72°C for 7 minutes.

182 After the initial PCR, all PCR amplicons were cleaned using PCRClean DX solid-phase  
183 reversible immobilization magnetic beads (Aline Biosciences, Woburn, MA). Each PCR reaction

184 was quantified using Accublu High Sensitivity dsDNA Quantitation kit (Biotium, Fremont, CA)  
185 and normalized to 6 ng/ul. Each group of 384 PCR products was then pooled into a single  
186 library, for a total of 3 libraries. Individual libraries were then tagged with an additional 6 base  
187 pair identifying index using the NEBnext Ultra II DNA Library Prep kit (New England Biolabs,  
188 Ipswich, MA). Pooled samples were analyzed on a Bioanalyzer to confirm fragment size. The  
189 libraries were then sequenced on one lane of Illumina HiSeq 3000 2 x 150 bp PE at the Center  
190 for Genome Research and Biocomputing at Oregon State University.

191

### 192 Sequence analysis

193 Raw sequence reads were analyzed using a bioinformatics pipeline designed to trim and  
194 sort the sequence reads according to scat sample identification. An outline of the bioinformatic  
195 process is as follows: (1) raw reads were paired using PEAR (Zhang et al. 2013); (2) followed by  
196 demultiplexing using 8 basepair index sequences unique to each sample (mismatches discarded);  
197 (3) lastly, sequences from each sample were clustered by 100% similarity and taxonomically  
198 assigned using BLAST against 12S vertebrate sequences in GenBank and from a custom 12S  
199 database.

200 Similar to the step-wise methods used by De Barba et al. (2014), a series of filtering and  
201 quality control measures were carried out on taxonomically assigned sequences. We initially  
202 removed sequences that were identified to be *Canis* spp. and contaminants based on read counts  
203 in no-template controls (which contained primarily human contamination). We then removed  
204 sample replicates that failed to amplify during PCR which included sample replicates with fewer  
205 than a total of 400 sequence reads. We compared taxonomic assignments with known fauna of  
206 southeast Alaska (MacDonald and Cook 2007) to replace non-regional species identified with

207 BLAST with closely-related regional taxa. We then excluded prey items occurring in fewer than  
208 2 of 3 PCR replicates. Finally, we combined those sample replicates that amplified so that  
209 sequence reads were totaled for each species within a sample and over the entire sample and  
210 eliminated sequences that appeared in less than 1% of the total reads for an individual sample.

211

### 212 Age of scats

213 Prior to processing, we observed marked differences between the appearance and quality  
214 of scats (Fig. 2). We performed t-tests to determine whether the perceived age of a scat made  
215 during field collection correlated with either the average quantity of DNA (ng/ul) in a sample  
216 (measured post normalization using Accublock High Sensitivity dsDNA Quantitation kit  
217 (Biotium, Fremont, CA)), the total number of sequence reads in a sample including the wolf  
218 defecator, or the total number of sequence reads excluding wolf.

219

### 220 Frequency of occurrence

221 We used both frequency of occurrence (FOO) and metrics of relative abundance (see  
222 below) to describe the occurrence of prey in wolf diet. FOO was calculated to determine which  
223 prey species were present and how often they were present based on the number of samples. For  
224 mechanical sorting methods, a species was present if there was evidence (including trace  
225 elements) of a prey species (e.g., hair, bone, scales, etc.) within a scat sample. FOO was then  
226 calculated as the proportion of scats in which a prey species occurred. For metabarcoding, a  
227 species occurrence was determined by whether sequence reads for a particular species were  
228 found in an individual scat after quality control measures. We compared FOO from mechanical  
229 sorting and metabarcoding using the subset of scats analyzed by both methods (n = 104), but we

230 additionally present diet analysis from all scats collected on Princes of Wales Island and close  
231 surrounding islands (n = 118 metabarcoding; n = 98 mechanical sorting) to describe diet on  
232 POW.

233 To analyze discrepancies between species present in samples with mechanical sorting and  
234 not found with metabarcoding, we used generalized logistic regression with logit link to explore  
235 whether false positives from mechanical sorting or false negatives generated from metabarcoding  
236 best explained the absence of species. Statistical analyses were conducted in the R statistical  
237 program using the ‘stats’ package (R Core Team 2018). We reasoned that false negatives could  
238 arise if scats contained poor quality DNA or sequencing depth was insufficient. We therefore fit  
239 three separate logistic regression models using average DNA quantity per sample (across the  
240 three replicates PCRs), total number of sequence reads prior to quality control and including  
241 wolf sequence reads, and total number of sequences reads post quality control and not including  
242 wolf sequences reads as univariate predictors in each model. In our analysis, zeroes were defined  
243 as an absence in metabarcoding where mechanical sorting had indicated an occurrence of a  
244 particular species in a sample; one indicated where metabarcoding was in agreement with  
245 occurrence found in mechanical sorting. Therefore, positive coefficients imply an increasing rate  
246 of proper assignment as DNA quality or sequencing depth increases. The absence of such an  
247 effect would suggest that mismatch between metabarcoding and mechanical sorting is unlikely to  
248 be due to false negatives by metabarcoding.

249

### 250 Relative abundance

251 To test whether metabarcoding and mechanical sorting yield similar metrics for relative  
252 abundance of a prey species within a scat, we compared percent estimated volume from

253 mechanical sorting with the relative read abundance (RRA) from metabarcoding. RRA for each  
254 species  $i$  was calculated as

255

$$256 \quad RRA_i = \frac{1}{S} \sum_{k=1}^S \frac{n_{i,k}}{\sum_{i=1}^T n_{i,k}} \quad [1]$$

257

258 where  $n_{i,k}$  is the number of sequences of prey species  $i$  in sample  $k$ ,  $S$  is the total number of  
259 samples, and  $T$  is the total number of species. We compared estimated volume of a prey species  
260 from mechanical sorting with RRA from metabarcoding using simple linear regression (R Core  
261 Team 2018).

262 For both the frequency of occurrence and relative abundance analyses we additionally  
263 revisited results from scats with mismatches from metabarcoding and mechanical sorting to  
264 assess whether metabarcoding found many sequence reads of an alternative species that was  
265 incorrectly assigned by mechanical sorting and was thus likely a false positive.

266

## 267 **Results**

### 268 Age of scats

269 Purportedly fresh scats contained significantly more total sequence reads on average  
270 ( $\mu_{\text{fresh}} = 269,514 \pm 173,902$ ) compared to the total number of reads from degraded wolf scats  
271 ( $\mu_{\text{degraded}} = 200,378 \pm 135,646$ ) ( $t = 2.09$ ,  $df = 85$ ,  $p\text{-value} = 0.039$ ). Likewise, fresh scats ( $\mu_{\text{fresh}} =$   
272  $139,939 \pm 135,858$ ) had significantly more wolf sequence reads than degraded scats ( $\mu_{\text{degraded}} =$   
273  $52,411 \pm 75,531$ ) ( $t = 3.80$ ,  $df = 73.73$ ,  $p\text{-value} < 0.001$ ). However, we found no significant  
274 difference between degraded and fresh scats when considering only reads from prey items  
275 (excluding any wolf DNA reads), although degraded scats yielded a greater average number of

276 non-wolf reads per sample than fresh scats ( $\mu_{\text{degraded}} = 147,966 \pm 125,223$ ;  $\mu_{\text{fresh}} = 129,575 \pm$   
277  $124,124$ ;  $t = -0.69$ ,  $df = 84.18$ ,  $p\text{-value} = 0.49$ ) (Fig. 4). Fresh scats had a higher average DNA  
278 quantity post PCR (ng/ul;  $\mu_{\text{degraded}} = 4.12 \pm 1.97$ ;  $\mu_{\text{fresh}} = 4.55 \pm 2.20$ ) but the difference was not  
279 statistically significant ( $t = 0.97$ ,  $df = 85.93$ ,  $p\text{-value} = 0.33$ ).

280

### 281 Comparing wolf diet by mechanical sorting and metabarcoding – frequency of occurrence

282 We compared wolf diet from 104 scat samples that were analyzed with both mechanical  
283 sorting and metabarcoding. Metabarcoding revealed a number of rare species that were not found  
284 using mechanical sorting methods and thus revealed greater dietary diversity (Fig. 5). Species  
285 that were found with metabarcoding methods but were absent when using mechanical sorting  
286 methods include: duck (*Anas* spp.), dusky grouse (*Bonasa umbellus*), elk (*Cervus elaphus*), raven  
287 (*Corvus* species), Northern collared lemming (*Dicrostonyx groenlandicus*), Steller sea lion  
288 (*Eumetopias jubatus*), American marten (*Martes americana*), and American red squirrel  
289 (*Tamiasciurus hudsonicus*). Mechanical methods identified moose (*Alces alces*) in a single scat  
290 where metabarcoding did not, although moose was identified by metabarcoding in this particular  
291 scat prior to quality filtering.

292 Frequency of occurrence (FOO) (Fig. 5) results were similar with both methods.  
293 However, there was substantial discrepancy between the primary prey species (Sitka black-tailed  
294 deer) and the secondary prey species (beaver) between metabarcoding and mechanical  
295 occurrence results. The occurrence of deer was greater in the mechanical sorting results  
296 ( $FOO_{\text{mech}} = 0.962$ ) compared to metabarcoding results ( $FOO_{\text{MB}} = 0.8$ ) and the occurrence of  
297 beaver was twice as frequent in the mechanical sorting ( $FOO_{\text{mech}} = 0.519$ ) results compared to  
298 metabarcoding ( $FOO_{\text{MB}} = 0.236$ ).

299            Logistic regression to assess mismatch between metabarcoding and mechanical sorting  
300 revealed that neither average DNA quantity, total sequence reads, nor total sequence reads of  
301 prey (i.e. excluding wolf) were associated with failing to detect species that were identified by  
302 metabarcoding (Table 1). However, contrary to predictions, increasing number of prey sequence  
303 reads (i.e. excluding wolves) was associated with increasing mismatch with beaver occurrences  
304 detected by mechanical sorting ( $p = 0.025$ ), which suggests that the error was due to  
305 misassignment by mechanical sorting rather than by metabarcoding. Thirty-two of the 59 beaver  
306 occurrences had disagreement between mechanical sorting and metabarcoding results. Notes and  
307 hair slides taken during mechanical sorting showed that 18 of the 32 mismatches could be  
308 attributed to false positives generated from mechanical sorting. In addition, a substantial number  
309 of definitive deer occurrences (i.e. high relative read abundance for deer) were mistakenly  
310 assigned to beaver by mechanical sorting (Fig. 6), further suggesting that mismatch between  
311 methods was due to misassignment by mechanical sorting.

312

### 313 *Comparing wolf diet by mechanical sorting and metabarcoding – relative read abundance*

314            There was minimal discrepancy between RRA of primary prey species (metabarcoding)  
315 and their estimated volume in scats (mechanical sorting); the difference between RRA and  
316 estimated volume for deer was 2% ( $RRA_{\text{deer}} = 68.3\%$ ;  $\text{estimated volume}_{\text{deer}} = 66.3\%$ ) and for  
317 beaver it was less than 7% ( $RRA_{\text{beaver}} = 14.1\%$ ;  $\text{estimated volume}_{\text{beaver}} = 20.5\%$ ). For the rarer  
318 species, we found a close association (within 2%) between the RRA and the estimated volume  
319 for that species.

320            The estimated volume from mechanical sorting was positively correlated with RRA of  
321 deer ( $\beta = 0.53$ ;  $R^2 = 0.26$ ;  $p < 0.01$ ,  $n = 87$ ), beaver ( $\beta = 0.57$ ;  $R^2 = 0.28$ ;  $p < 0.01$ ,  $n = 25$ ), and

322 black bear ( $\beta = 0.80$ ;  $R^2 = 0.28$ ;  $p = 0.17$ ,  $n = 6$ ) (Fig. 6), supporting a positive but variable  
323 relationship between the volume of parts of a particular species found in the physical scat and the  
324 proportion of DNA sequence reads for that species. However, substantial variability is likely due  
325 to species misidentification by mechanical sorting such as deer falsely identified as beaver (Fig.  
326 6).

327

### 328 Prince of Wales

329 Metabarcoding of scats found only within Prince of Wales Island (POW) (Fig. 7)  
330 revealed 14 species (Supplementary table) including Sitka black-tailed deer ( $FOO_{MB\_POW} =$   
331  $0.852$ ), beaver ( $FOO_{MB\_POW} = 0.231$ ), and black bear ( $FOO_{MB\_POW} = 0.157$ ) were the most  
332 common prey items (Fig. 7). Other common prey species were salmon (*Oncorhynchus* spp.)  
333 ( $FOO_{MB\_POW} = 0.056$ ), American marten (*Martes americana*) ( $FOO_{MB\_POW} = 0.046$ ), North  
334 American river otter (*Lontra canadensis*) ( $FOO_{MB\_POW} = 0.037$ ), and bald eagle (*Haliaeetus*  
335 *leucocephalus*) ( $FOO_{MB\_POW} = 0.019$ ). Additional prey items in less than 1% of scats include  
336 American red squirrel (*Tamiasciurus hudsonicus*), deermouse (*Peromyscus* spp.), vole (*Myodes*  
337 and *Microtus* spp.), dusky grouse (*Bonasa umbellus*), duck (*Anas* spp.), and unidentified bird  
338 species.

339 Mechanical sorting revealed a total of 10 prey species (Fig. 7), including harbor seal  
340 which was not found with metabarcoding for the POW samples. However, it should be noted that  
341 for this sample, mechanical sorting estimated only 2% harbor seal and metabarcoding instead  
342 found otter, which could have been mistaken for harbor seal during sorting. Deer ( $FOO_{mech\_POW}$   
343  $= 0.969$ ) and beaver ( $FOO_{mech\_POW} = 0.561$ ) (the two primary prey species) showed greater FOO  
344 compared to metabarcoding, although mechanical sorting did not show any American marten



345 and had a lower FOO of salmon species compared to the metabarcoding results. There was also  
346 substantial occurrence of material from unknown species in the mechanical results ( $FOO_{\text{mech\_POW}}$   
347 = 0.163) that is not seen with metabarcoding.

348

## 349 **Discussion**

350 DNA metabarcoding has emerged as a novel method for diet analysis because of the  
351 ability to reveal rare or difficult to identify species (Shehzad et al. 2012, De Barba et al. 2014,  
352 Berry et al. 2015, Srivathsan et al. 2015, Kartzinel et al. 2015, McInnes et al. 2017, Buglione et  
353 al. 2018). However, substantial uncertainty remains as to whether inference from mechanical  
354 sorting and DNA metabarcoding produce comparable results, particularly if scats are of  
355 uncertain age and quality. Our results suggest that excluding purportedly degraded scats from  
356 DNA metabarcoding analyses does not improve inference about diet. Perceived fresh scats  
357 contained on average a greater number of reads per scat when including wolf sequence reads, but  
358 there was no significant difference in the average number of reads between fresh and degraded  
359 scats when only including reads from prey species (Fig. 4). The average quantity of DNA was  
360 also not significantly different between fresh and degraded scats; this is likely because fresh scats  
361 contained more fecal material relative to hair and bone, and total DNA quantity per sample is  
362 normalized prior to sequencing such that abundant wolf DNA leads to dilution of prey DNA.  
363 Many degraded scats were primarily clusters of hair and bone that were washed of fecal material.  
364 Importantly, these results suggest that metabarcoding is sensitive enough to determine prey  
365 assemblages in degraded scats and thus scat collection and processing should not be predicated  
366 upon perceived scat quality.

367 FOO and RRA metrics were qualitatively similar among methods. RRA of each species  
368 was significantly correlated with estimated volume determined with mechanical sorting ( $p_{\text{all}} <$   
369  $0.01$ ,  $p_{\text{deer}} < 0.01$ ,  $p_{\text{beaver}} < 0.01$ ,  $p_{\text{bear}} = 0.16$ ) suggesting that RRA can be a reasonable proxy for  
370 volume of prey species obtained from mechanical sorting (which in turn could be used to  
371 estimate relative biomass using biomass equations that correct for body size (Weaver 1993)).  
372 Both mechanical sorting and metabarcoding agreed that Sitka black-tailed deer was the primary  
373 prey item, followed by beaver, and then black bear as suggested by previous research in this  
374 region (Kohira, 1995; Kohira & Rexstad, 1997) (Fig. 5). However, both deer and beaver  
375 occurred substantially more frequently in mechanically sorted scats than in metabarcoded scats.  
376 The divergence between the two methods examined in our study was more substantial for beaver  
377 which were identified mechanically in 52% of scats while only detected by metabarcoding in  
378 24%.

379 We closely examined scats that were mismatched (i.e. the prey species was found in a  
380 scat during mechanical sorting but not found in the same scat with DNA metabarcoding) with a  
381 focus on beaver to assess whether mismatches were due to false positives produced from  
382 mechanical sorting or false negatives produced from metabarcoding. Eighteen of the 32  
383 mismatched samples show evidence of false positive resulting from mechanical sorting. In these  
384 scats, beaver was thought to be present, but notes during sorting specified uncertainty that these  
385 small amounts of unknown hair samples could also be attributed to deer or black bear. In fact, we  
386 found that in all mismatched beaver samples metabarcoding showed a high RRA of deer and  
387 mechanical sorting found low volume of deer, strongly suggesting that mechanical sorting mis-  
388 assigned deer hair to beaver as the primary prey species in that scat (highlighted in Fig. 6). Our

389 logistic regression analysis additionally suggests that these errors resulted from mis-assignment  
390 by mechanical sorting rather than metabarcoding (Table 1).

391         Why do we see these potential false positives generated from mechanical sorting? One  
392 explanation is that relying on mechanical sorting of scats results in the overestimation of primary  
393 prey species (i.e. deer and beaver) due to search image bias. Mechanical sorting can lead to  
394 mislabeling difficult to identify parts as common species rather than an infrequently detected  
395 species because the researcher is accustomed to encountering the common prey species. The  
396 pronounced difference seen in beaver FOO could also be attributed to the difficulty in  
397 distinguishing between beaver and guard hair from other species such as deer and black bear  
398 (Fig. 8).

399         The remaining 14 of the 32 beaver mismatches were attributed to false negatives  
400 generated by metabarcoding; we concluded this because beaver was verified to have occurred in  
401 mechanical sorting but was absent from metabarcoding results. However, for 10 of these scats  
402 beaver occurred in the metabarcoding results prior to quality filtering that removed prey that  
403 occurred in fewer than 2 of 3 PCR replicates and with fewer than 1% of the total reads  
404 (importantly, beaver was nearly absent from our negative controls), which had the effect of  
405 underestimating prey items that occurred in only a small portion of a scat. It is important to note  
406 that our conservative quality filtering thresholds following De Barba et al. (2014) led to some of  
407 these false negatives at the expense of false positives. Thus, it is imperative to explicitly reason  
408 through quality control protocols to balance false positives and false negatives when using  
409 bioinformatically-generated metabarcoding data.

410         There was also divergence in the detection of rare species among methods. Although  
411 metabarcoding revealed several clear false negatives, this was substantially more common with

412 mechanical sorting where 8 species in final metabarcoding results were not found by mechanical  
413 sorting for the same subset of samples. In particular, American marten, Northern collared  
414 lemming, and a number of bird species were missing from mechanical sorting but evident in the  
415 metabarcoding results. This conclusion supports our initial prediction that metabarcoding would  
416 be more advantageous in identifying rare species.

417

418 *POW wolf diet – policy and management*

419 The issue of what wolves eat and how much is an important question in southeast Alaska  
420 and in particular on Prince of Wales Island where there are concerns about the long-term  
421 viability of wolves given the trophic linkage between wolves, Sitka black-tailed deer, and old-  
422 growth forest. The population of Sitka black-tailed deer is expected to decline in this region with  
423 continued logging of old-growth forests (Person and Brinkman 2017). Given this, wolf  
424 populations are predicted to decline and these declines are most significant under scenarios  
425 where wolves rely heavily on deer in the future (Gilbert et al. 2016).

426 Our study shows the promise of eDNA and metabarcoding methods to examine wolf diet  
427 diversity and diet changes. Comparing our results with previous work indicated that the  
428 occurrence of the primary prey species (Sitka black-tailed deer) is comparable on POW; Person  
429 et al. (1996) reported a >90% occurrence while we report 85.2% occurrence using DNA  
430 metabarcoding and 96.9% occurrence using mechanical sorting. However, the occurrence of  
431 beaver is greater compared to previous work; the frequency of occurrence of beaver was 13.7%  
432 (Person et al. 1996) and 31% (Kohira and Rexstad 1997), whereas we report 23.1% occurrence  
433 using DNA metabarcoding and 56.1% using mechanical sorting. These previous studies found  
434 that aside from Sitka black-tailed deer, beaver, and black bear, the only significant other prey

435 were small mustelid species, river otter, and fish. Our results show a diverse diet with 14 total  
436 prey species identified from mechanical sorting that contribute to wolf diet on POW (Fig. 7),  
437 which more closely resembles the diversity found by Darimont et al. (2004) in their study of  
438 wolf diet using scats along the coastal region in British Columbia. Importantly, our findings  
439 suggest that metabarcoding was able to reveal the breadth of Alexander Archipelago wolf diet  
440 diversity more accurately than mechanical sorting. (24 vs. 14 refer to Appendix S1: Table S1).

441 Continued diet analysis using metabarcoding of wolf scats found on POW could reveal  
442 whether this increase in diversity is due to the increased power in the method used  
443 (metabarcoding vs. mechanical sorting), or if wolves are beginning to exhibit increased  
444 opportunistic predation on species other than Sitka black-tailed deer. Given that we also found  
445 greater dietary diversity using mechanical sorting compared to results using the same methods  
446 from the mid-1990's points towards a potential dietary shift in wolves on POW (Kohira and  
447 Rexstad 1997). The rate of clear-cut logging in this region peaked during the late 1980's and  
448 1990's and while this rate has slowed in recent years, a total of nearly 30% of old-growth forests  
449 have been logged on POW (U.S. Fish and Wildlife Service 2015). Because young-growth stands  
450 older than 25 years are the least productive in terms of deer forage (U.S. Fish and Wildlife  
451 Service 2015), the effects of potential deer abundance decline on wolf populations are only just  
452 being realized. As well-known diet generalists, it remains to be seen whether wolves on POW  
453 are resilient to landscape-level ecological changes expected from old-growth logging.

454 Metabarcoding has revealed a more diverse and precise diet for wolves on POW and in  
455 southeast Alaska, potentially pointing towards these wolves making greater use of alternate prey.  
456 In general, DNA metabarcoding can be used as a tool to reliably describe diet for other carnivore  
457 species. Even in a hostile environment for the preservation of eDNA, we have shown that DNA

458 metabarcoding is an effective and powerful method for describing carnivore diet. Diet analysis  
459 remains one of the most important avenues of wildlife study as it is a necessary component of  
460 understanding species interactions, predator-prey dynamics, and the biodiversity of systems. This  
461 nuanced profiling of diet is especially important as vulnerable wildlife populations face  
462 continued habitat loss and degradation, and thus we can use changes in diet can as potential  
463 indicators of environmental health.

464

#### 465 **Acknowledgements**

466 This research was funded by the Alaska Department of Fish and Game and by Oregon State  
467 University. The authors would like to thank all those involved with collecting wolf scats  
468 including T. Bentz, S. Bethune, D. Gregovich, J. Jemmison, M. Kampnich, K. Larson, J. Manuel,  
469 G. Roffler, J. Reeves, S. Sell, Y. Shakeri, and R. Slayton as well as C. Cousins, D. Martinez, and  
470 A. Pepper for the assistance with the mechanical sorting of scats. The Center for Genome  
471 Research and Biocomputing (CGRB) at Oregon State University provided both access to the  
472 Illumina HiSeq 3000 for all metabarcoding and support for initial bioinformatic analysis.

473

#### 474 **Literature Cited**

475 Alaback, P. B. 1982. Dynamics of Understory Biomass in Sitka Spruce-Western Hemlock Forest  
476 of Southeast Alaska: Ecological Archives E063-004. *Ecology* 63:1932–1948.  
477 Albert, D. M., and J. W. Schoen. 2013. Use of historical logging patterns to identify  
478 disproportionately logged ecosystems within temperate rainforests of southeastern  
479 Alaska. *Conservation Biology* 27:774–784.

- 480 Berry, O., C. Bulman, M. Bunce, M. Coghlan, D. C. Murray, and R. D. Ward. 2015. Comparison  
481 of morphological and DNA metabarcoding analyses of diets in exploited marine fishes.  
482 *Marine Ecology Progress Series* 540:167–181.
- 483 Binladen, J., M. Gilbert, J. Bollback, F. Panitz, C. Bendixen, R. Nielsen, and E. Willerslev. 2007.  
484 The use of coded PCR primers enables high-throughput sequencing of multiple homolog  
485 amplification products by 454 parallel sequencing. *PLoS ONE* 2:e197.
- 486 Buglione, M., V. Maselli, D. Ripa, G. de Filippo, M. Trapanese, and D. Fulgione. 2018. A pilot  
487 study on the application of DNA metabarcoding for non-invasive diet analysis in the  
488 Italian hare. *Mammalian Biology* 88:31–42.
- 489 Carrlee, E., and L. Horelick. 2011. The Alaska Fur ID Project: A virtual resource for material  
490 identification. *Objects Specialty Group Postprints* 18:149–171.
- 491 Ciucci, P., L. Boitani, E. R. Pelliccioni, M. Rocco, and I. Guy. 1996. A comparison of scat-  
492 analysis methods to assess the diet of the wolf *Canis lupus*. *Wildlife biology* 2:37–48.
- 493 Cook, J. A., N. Dawson, and S. MacDonald. 2006. Conservation of highly fragmented systems:  
494 The north temperate Alexander Archipelago. *Biological Conservation* 133:1–15.
- 495 Darimont, C. T., P. C. Paquet, and T. E. Reimchen. 2008a. Spawning salmon disrupt tight  
496 trophic coupling between wolves and ungulate prey in coastal British Columbia. *BMC*  
497 *Ecology* 8.
- 498 Darimont, C. T., M. H. H. Price, N. N. Winchester, J. Gordon-Walker, and P. C. Paquet. 2004.  
499 Predators in natural fragments: foraging ecology of wolves in British Columbia's central  
500 and north coast archipelago. *Journal of Biogeography* 31:1867–1877.

- 501 Darimont, C. T., T. E. Reimchen, H. M. Bryan, and P. C. Paquet. 2008b. Faecal-centric  
502 approaches to wildlife ecology and conservation: methods, data and ethics. *Wildlife*  
503 *Biology in Practice* 4:73–87.
- 504 Darimont, C. T., T. E. Reimchen, and P. C. Paquet. 2003. Foraging behavior by gray wolves on  
505 salmon streams in coastal British Columbia. *Canadian Journal of Zoology* 81:349–353.
- 506 De Barba, M., C. Miquel, F. Boyer, C. Mercier, D. Rioux, E. Coissac, and P. Taberlet. 2014.  
507 DNA metabarcoding multiplexing and validation of data accuracy for diet assessment:  
508 application to omnivorous diet. *Molecular Ecology* 14:306–323.
- 509 Deagle, B. E., A. C. Thomas, J. C. McInnes, L. J. Clarke, E. J. Vesterinen, E. L. Clare, T. R.  
510 Kartzinel, and J. P. Eveson. 2018. Counting with DNA in metabarcoding studies: How  
511 should we convert sequence reads to dietary data? *Molecular Ecology*:1–16.
- 512 Eriksson, C. E., K. M. Moriarty, M. A. Linnell, and T. Levi. 2019. Biotic factors influencing the  
513 unexpected distribution of a Humboldt marten (*Martes caurina humboldtensis*)  
514 population in a young coastal forest. *PLoS ONE* 14:e0214653.
- 515 Farmer, C. J., and M. Kirchhoff. 2007. Ecological classification of deer habitat in the Tongass  
516 National Forest, Alaska. *Northwestern Naturalist*:73–84.
- 517 Gilbert, S. L., T. Haynes, M. S. Lindberg, D. Albert, M. Kissling, and D. K. Person. 2016. Future  
518 population trends and drivers of change for Alexander Archipelago wolves on and near  
519 Prince of Wales Island, Alaska.
- 520 Gilbert, S. L., K. J. Hundertmark, D. K. Person, M. S. Lindberg, and M. S. Boyce. 2017.  
521 Behavioral plasticity in a variable environment: snow depth and habitat interaction drive  
522 deer movement in winter. *Journal of Mammalogy* 98:246–259.



- 523 Kartzinel, T. R., P. A. Chen, T. C. Coverdale, D. L. Erickson, W. J. Kress, M. L. Kuzmina, D. I.  
524 Rubenstein, W. Wang, and R. M. Pringle. 2015. DNA metabarcoding illuminates dietary  
525 niche partitioning by African large herbivores. *PNAS* 112:8019–8024.
- 526 Kohira, M. 1995. Diets of wovles on Prince of Wales Island, southeast Alaska. University of  
527 Alaska Fairbanks, Fairbanks, Alaska.
- 528 Kohira, M., and E. A. Rexstad. 1997. Diets of Wolves, *Canis lupus*, in Logged and Unlogged  
529 Forest of Southeastern Alaska. *Canadian Field Naturalist* 111:429–435.
- 530 Krehenwinkel, H., M. Wolf, J. Y. Lim, A. J. Rominger, W. B. Simison, and R. G. Gillespie.  
531 2017. Estimating and mitigating amplification bias in qualitative and quantitative  
532 arthropod metabarcoding. *Scientific Reports* 7:17668.
- 533 Lafferty, D. J. R., J. L. Belant, K. S. White, W. N. Jamie, and A. T. Morzillo. 2014. Linking  
534 Wolf Diet to Changes in Marine and Terrestrial Prey Abundance. *Arctic* 67:143–148.
- 535 Lake, S., H. Burton, and J. van den Hoff. 2003. Regional, temporal and fine-scale spatial  
536 variation in Weddell seal diet at four coastal locations in east Antarctica. *Marine Ecology*  
537 *Progress Series* 254:293–305.
- 538 MacDonald, S., and J. Cook. 2007. Mammals and Amphibians of Southeast Alaska. The  
539 Museum of Southwestern Biology, University of New Mexico.
- 540 McInnes, J. C., R. Alderman, M.-A. Lea, B. Raymond, B. E. Deagle, R. A. Phillips, A.  
541 Stanworth, D. R. Thompson, P. Catry, H. Weimerskirch, C. G. Suazo, M. Gras, and S. N.  
542 Jarman. 2017. High occurrence of jellyfish predation by black-browed and Campbell  
543 albatross identified by DNA metabarcoding. *Molecular Ecology* 26:4831–4845.
- 544 Person, D. K., and T. J. Brinkman. 2017. Succession debt and roads. Pages 143–167 North  
545 Pacific Temperate Rainforests: Ecology and Conservation.

- 546 Person, D. K., M. Kirchhoff, V. Van Ballenberghe, G. C. Iverson, and E. Grossman. 1996. The  
547 Alexander Archipelago wolf: a conservation assessment.
- 548 Pinol, J., M. A. Senar, and W. O. C. Symondson. 2018. The choice of universal primers and the  
549 characteristics of the species mixture determine when DNA metabarcoding can be  
550 quantitative. *Molecular Ecology*:1–13.
- 551 Porter, B. 2018. Wolf management report and plan, Game Management Unit 2: Report period 1  
552 July 2010-30 June 2015, and plan period 1 July 2015-30 June 2020. Alaska Department  
553 of Fish and Game.
- 554 R Core Team. 2018. R: A language and environment for statistical computing. R Foundation for  
555 Statistical Computing, Vienna, Austria.
- 556 Riaz, T., W. Shehzad, A. Viari, F. Pompanon, P. Taberlet, and E. Coissac. 2011. ecoPrimers:  
557 inference of new DNA barcode markers from whole genome sequence analysis. *Nucleic  
558 Acids Research* 39:e145.
- 559 Schoen, J., M. Kirchhoff, and J. H. Hughes. 1988. Wildlife and old-growth forests in Southeast  
560 Alaska. *Natural Areas Journal* 8:138–145.
- 561 Shanley, C. S., S. Pyare, M. I. Goldstein, P. B. Alaback, D. M. Albert, C. M. Beier, T. J.  
562 Brinkman, R. T. Edwards, E. Hood, A. MacKinnon, and M. V. McPhee. 2015. Climate  
563 change implications in the northern coastal temperate rainforest of North America.  
564 *Climatic Change* 130:155–170.
- 565 Shehzad, W., T. Riaz, M. A. Nawaz, C. Miquel, C. Poillot, S. A. Shah, F. Pompanon, E. Coissac,  
566 and P. Taberlet. 2012. Carnivore diet analysis based on next-generation sequencing:  
567 application to the leopard cat (*Prionailurus bengalensis*) in Pakistan. *Molecular ecology*  
568 21:1951–1965.

- 569 Smith, M. A. 2016. Ecological Atlas of Southeast Alaska. Audubon Alaska.
- 570 Soininen, E. M., A. Valentini, E. Coissac, C. Miquel, L. Gielly, C. Brochmann, A. K. Brysting, J.  
571 H. Sonstebo, N. Yoccoz, and P. Taberlet. 2009. Analysing diet of small herbivores: The  
572 efficiency of DNA barcoding coupled with high-throughput pyrosequencing for  
573 deciphering the composition of complex plant mixtures. *Frontiers in Zoology* 6:16.
- 574 Srivathsan, A., J. C. M. Sha, A. P. Vogler, and R. Meier. 2015. Comparing the effectiveness of  
575 metagenomics and metabarcoding for diet analysis of a leaf-feeding monkey (*Pygathrix*  
576 *nemaeus*). *Molecular Ecology Resources* 15:250–261.
- 577 Stenglein, J. L., M. De Barba, D. E. Ausband, and L. P. Waits. 2010. Impacts of sampling  
578 location within a faeces on DNA quality in two carnivore species. *Molecular Ecology*  
579 *Resources* 10:109–114.
- 580 Szepanski, M. M., M. Ben-David, and V. Van Ballenberghe. 1999. Assessment of anadromous  
581 salmon resources in the diet of the Alexander Archipelago wolf using stable isotope  
582 analysis. *Oecologia* 120:327–335.
- 583 Thomas, A. C., B. E. Deagle, J. P. Eveson, C. H. Harsch, and A. W. Trites. 2016. Quantitative  
584 DNA metabarcoding: improved estimates of species proportional biomass using  
585 correction factors derived from control material. *Molecular Ecology Resources* 16:714–  
586 726.
- 587 Thomas, A. C., B. W. Nelson, M. M. Lance, B. E. Deagle, and A. W. Trites. 2017. Harbour seals  
588 target juvenile salmon of conservation concern. *Canadian Journal of Fisheries and*  
589 *Aquatic Sciences* 74:907–921.
- 590 U.S. Fish and Wildlife Service. 2015. Species status assessment for the Alexander Archipelago  
591 wolf (*Canis lupus ligoni*). Version 1.0. Alaska Region, Anchorage, Alaska. 162 pp.

592 Valentini, A., F. Pompanon, and P. Taberlet. 2009. DNA barcoding for ecologists. Trends in  
593 Ecology and Evolution 24:110–117.

594 Wallmo, O. C., A. W. Jackson, T. L. Hailey, and R. L. Carlisle. 1962. Influence of rain on the  
595 count of deer pellet groups. The Journal of Wildlife Management 26:50–55.

596 Wallmo, O. C., and J. Schoen. 1980. Response of deer to secondary forest succession in  
597 southeast Alaska. Forest Sciences 26:448–462.

598 Weaver, J. L. 1993. Refining the equation for interpreting prey occurrence in gray wolf scats.  
599 The Journal of Wildlife Management 57:534–538.

600 Zhang, J., K. Kobert, T. Floui, and A. Stamatakis. 2013. PEAR: a fast and accurate Illumina  
601 Paired-End reAd mergeR. Bioinformatics 30:614–620.

602

603

604

605

606

607

608

609

610

611

612

613

614

615

616

617 **Table 1:** Summary statistics for all generalized logistic regression models. Predictor variables  
618 include average DNA quantity per sample (avg DNA quant), total number of sequence reads  
619 prior to quality control and including wolf sequence reads (reads with wolf), and total number of  
620 sequences reads post quality control and not including wolf sequences reads (reads no wolf).  
621 Models were tested against all mechanically sorted samples that had a positive occurrence for a  
622 species and against all mechanically sorted samples that had a positive occurrence for beaver.

623

| Model                                   | Estimate  | SE       | z value | Pr(> z ) |
|-----------------------------------------|-----------|----------|---------|----------|
| spp.presence ~ avg DNA quantity         | 0.13      | 0.14     | 0.966   | 0.33     |
| spp.presence ~ total reads with wolf    | 4.16e-07  | 1.5e-06  | 0.273   | 0.79     |
| spp.presence ~ total reads no wolf      | -1.5e-07  | 1.63e-06 | -0.095  | 0.93     |
| beaver.presence ~ avg DNA quantity      | -0.034    | 0.139    | -0.25   | 0.81     |
| beaver.presence ~ total reads with wolf | 4.4e-07   | 1.78e-06 | 0.25    | 0.81     |
| beaver.presence ~ total reads no wolf   | -5.85e-06 | 2.61e-06 | -2.24   | 0.025*   |

624

625

626

627

628

629

630

631

## 632 **Figure Legends**

633 **Figure 1:** Study area map showing Alexander Archipelago in Southeast Alaska. Red and yellow  
634 points represent individual scat collection sites. Most scats collections were concentrated on  
635 Prince of Wales Island (yellow points).

636 **Figure 2:** Examples of wolf scats collected in southeast Alaska near Prince of Wales Island.  
637 Left-sided panels (a, c, and e) are examples of fresh scats (< 3 months old) and the right-sided  
638 panels (b, d, f) are examples of old/degraded scats (> 3 months old). Age was determined by the  
639 collector; scats were collected throughout 2014 – 2015.

640 **Figure 3:** Photographs depicting examples of fine-scale mechanical sorting results of prey  
641 species in wolf scats collected in Southeast Alaska, 2014-2015. Starting from the top left panel  
642 and moving clockwise, species shown are salmon, black bear, bald eagle, harbor seal, and  
643 sculpin.

644 **Figure 4:** Boxplots depicting the total number of reads and the DNA quantity (measured post  
645 normalization) for scat samples binned by the age of the scat.

646 **Figure 5:** Diet summary from analysis of wolf scats (Southeast Alaska, 2014-2015) using (a)  
647 metabarcoding methods and (b) mechanical sorting methods. For the diet trees, each branch and  
648 terminal node represent a prey species identified in the wolf scats with the size and color of the  
649 branch showing the number of occurrences of that prey species. Frequency of Occurrence and  
650 RRA and estimated volume are compared.

651 **Figure 6:** Correlation between relative read abundance data for metabarcoding methods and  
652 estimated volume for mechanical sorting methods by scat sample for the three most prevalent  
653 prey species from wolf scats, Southeast Alaska, 2014-2015. Estimated volume is measured as the

654 proportion of a prey species consumed per scat relative to the whole scat. RRA is the relative  
655 read abundance. Data points highlighted in brown show samples where deer was thought to be  
656 mistakenly identified as beaver in mechanical sorting.

657 **Figure 7:** Diet diversity, frequency of occurrence (FOO), and RRA and estimated volume found  
658 with a) metabarcoding results and b) mechanical results for scats found on Prince of Wales  
659 Island, Alaska.

660 **Figure 8:** Panel of hair samples. The top row shows examples of guard hairs from the Alaska  
661 Fur ID project of Sitka black-tailed deer, beaver, and black bear. The bottom row shows  
662 examples of scale pattern from scale casts from the Alaska Fur ID project of Sitka black-tailed  
663 deer, beaver, and black bear (left to right). The last panel in each row is an example of a difficult  
664 to identify hair and scale pattern from a wolf scat sample, Southeast Alaska 2014-2015.

665

666

667

668

669

670

671

672

673

674

675

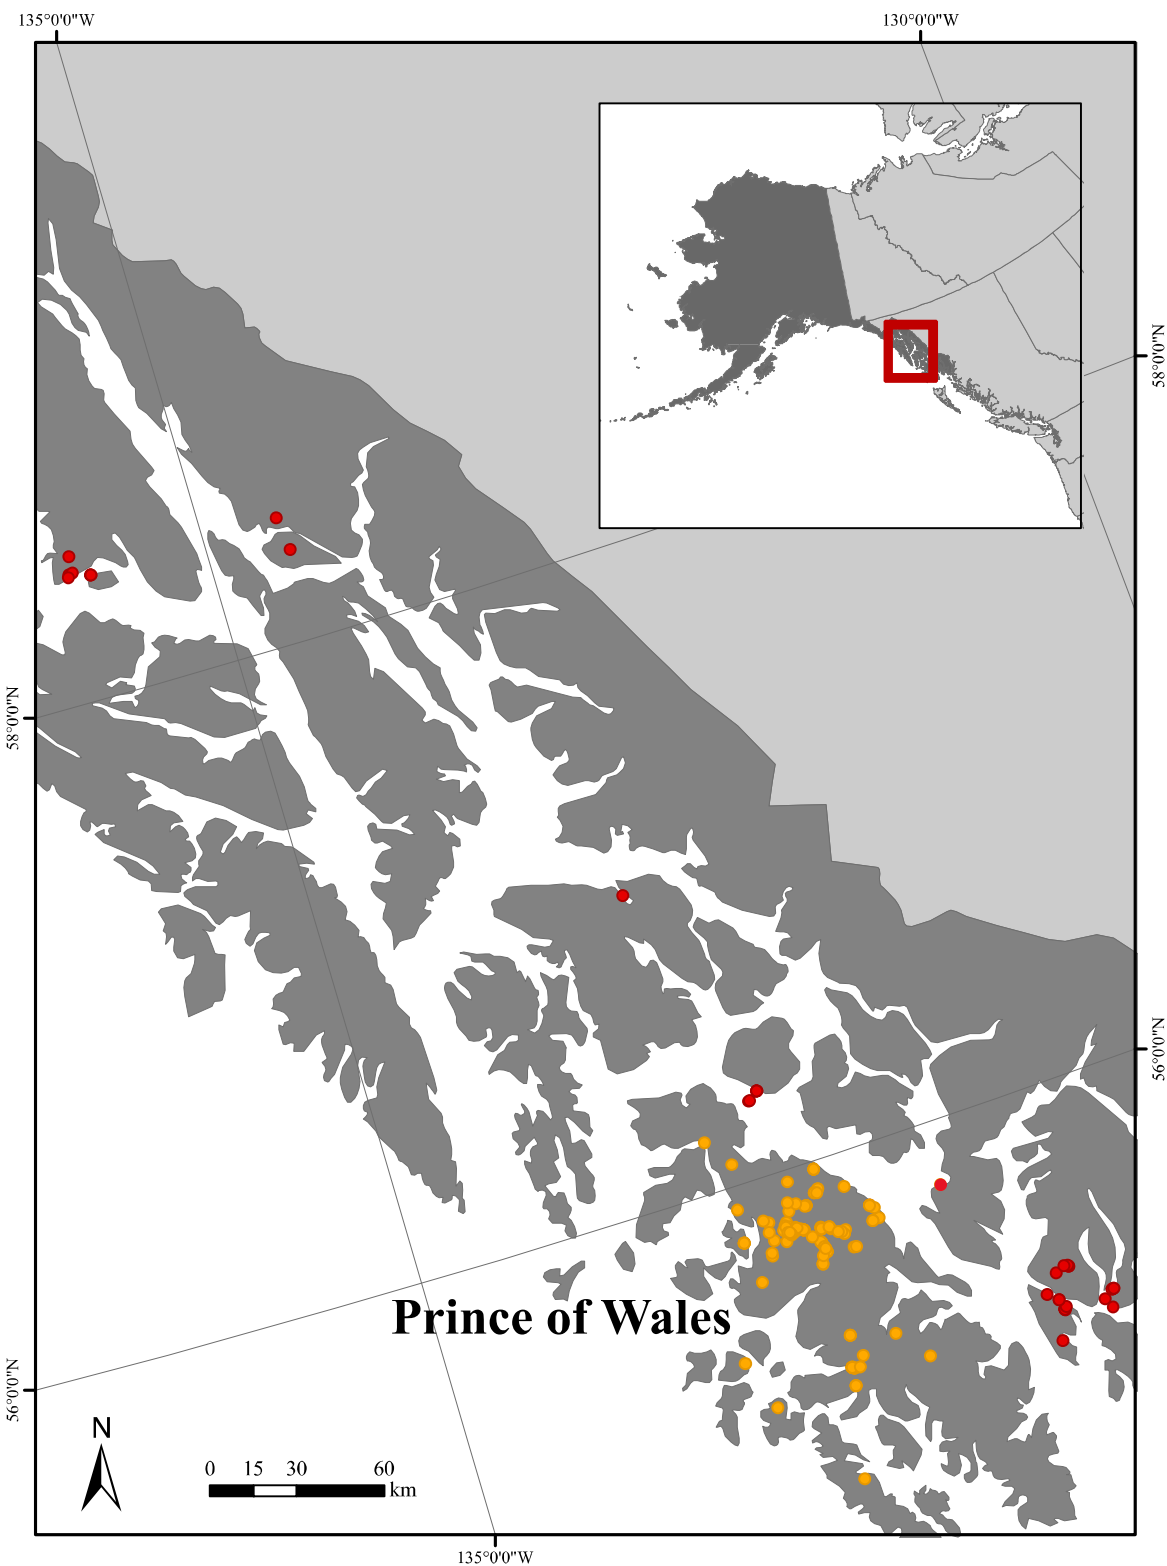



678 **Figure 2**

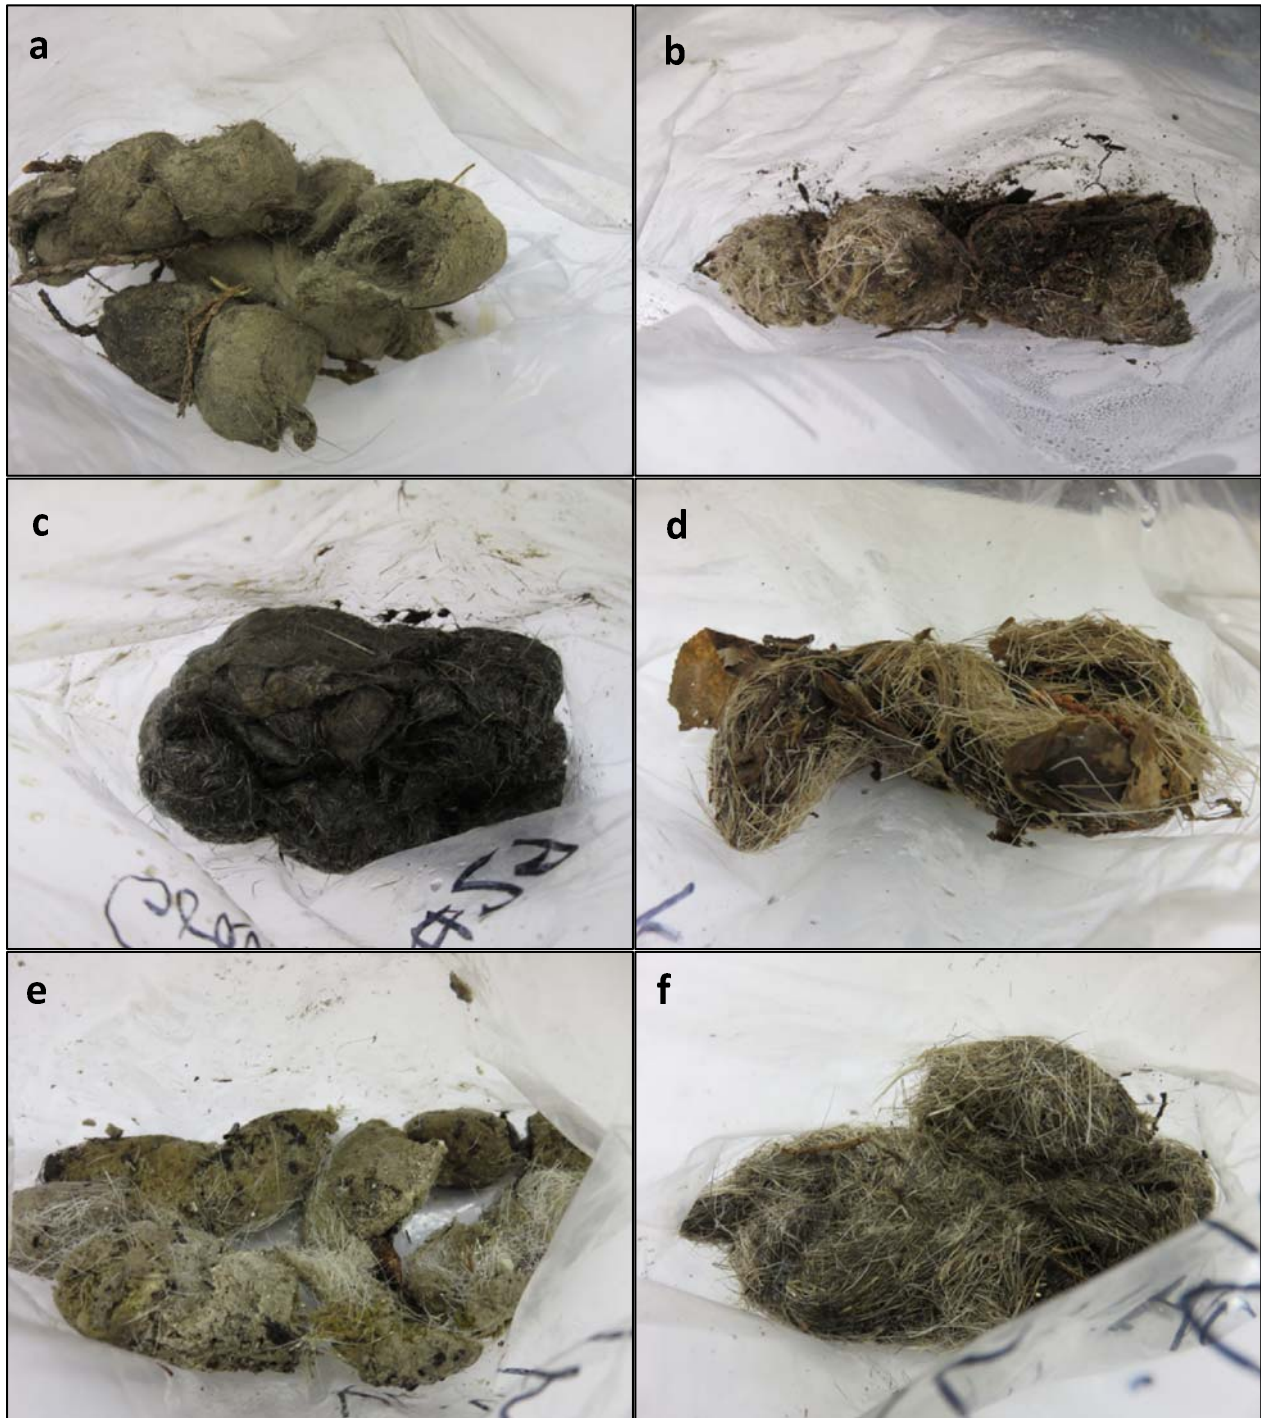

679

680

681

682 **Figure 3**

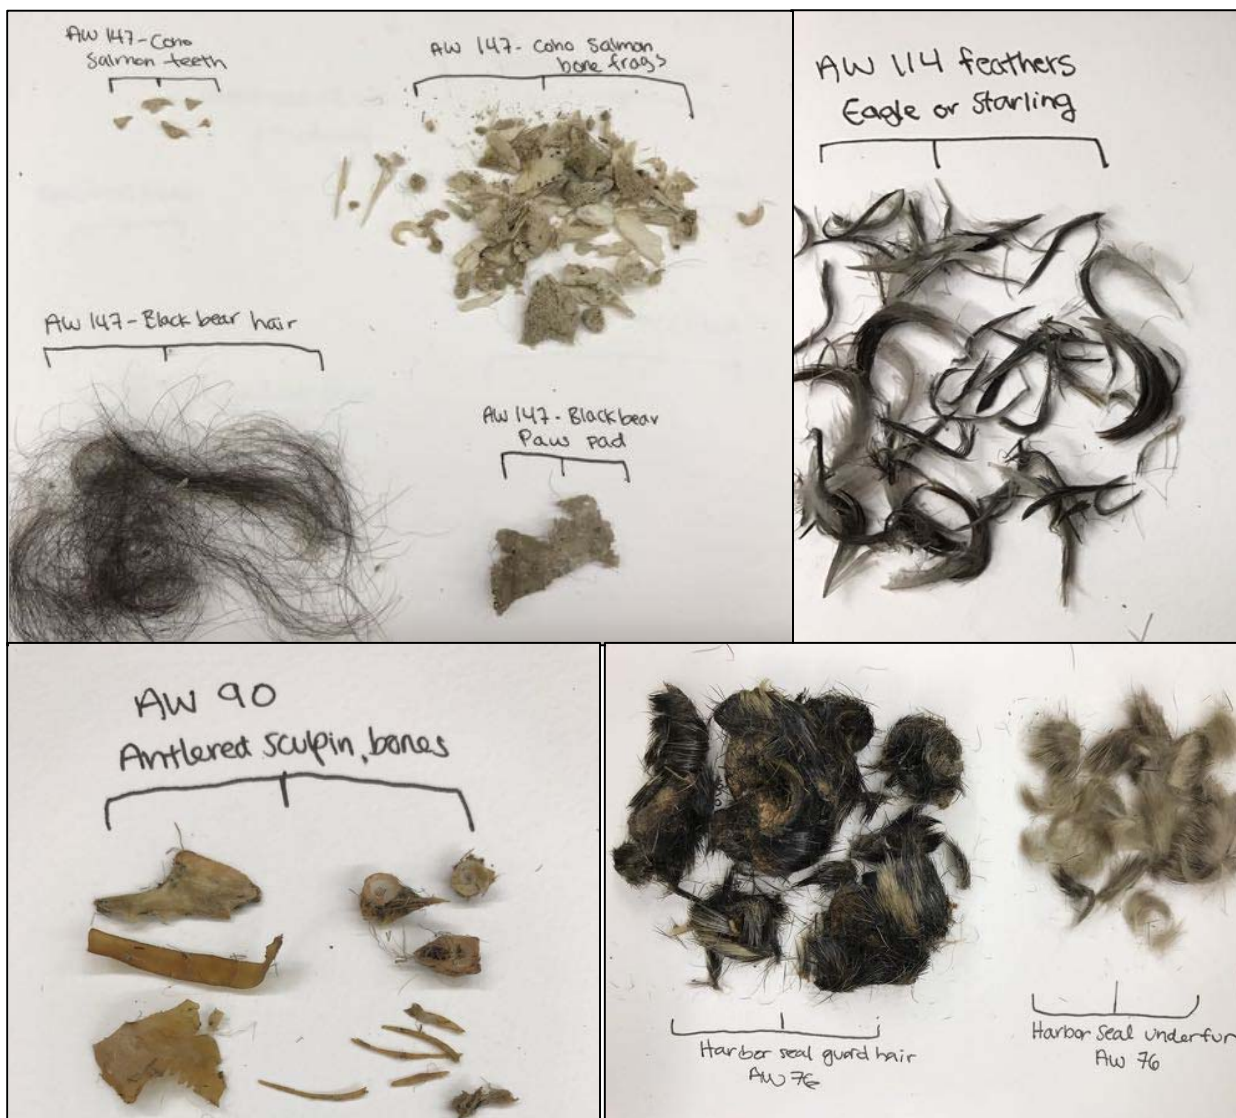

683

684

685

686

687

688

689

690 **Figure 4**

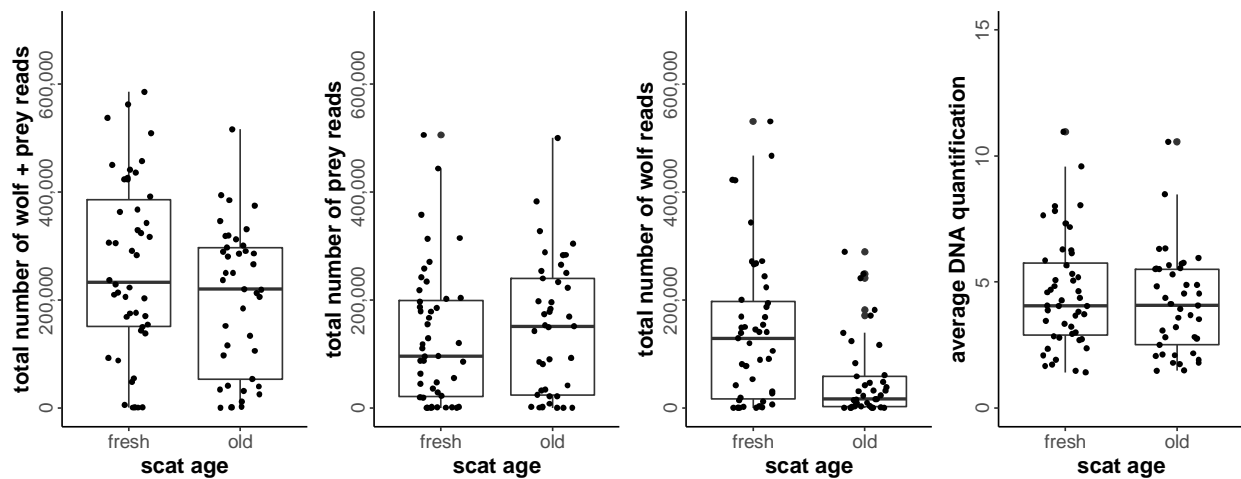

691

692

693

694

695

696

697

698

699

700

701

702

703

704

705

706

707 **Figure 5**

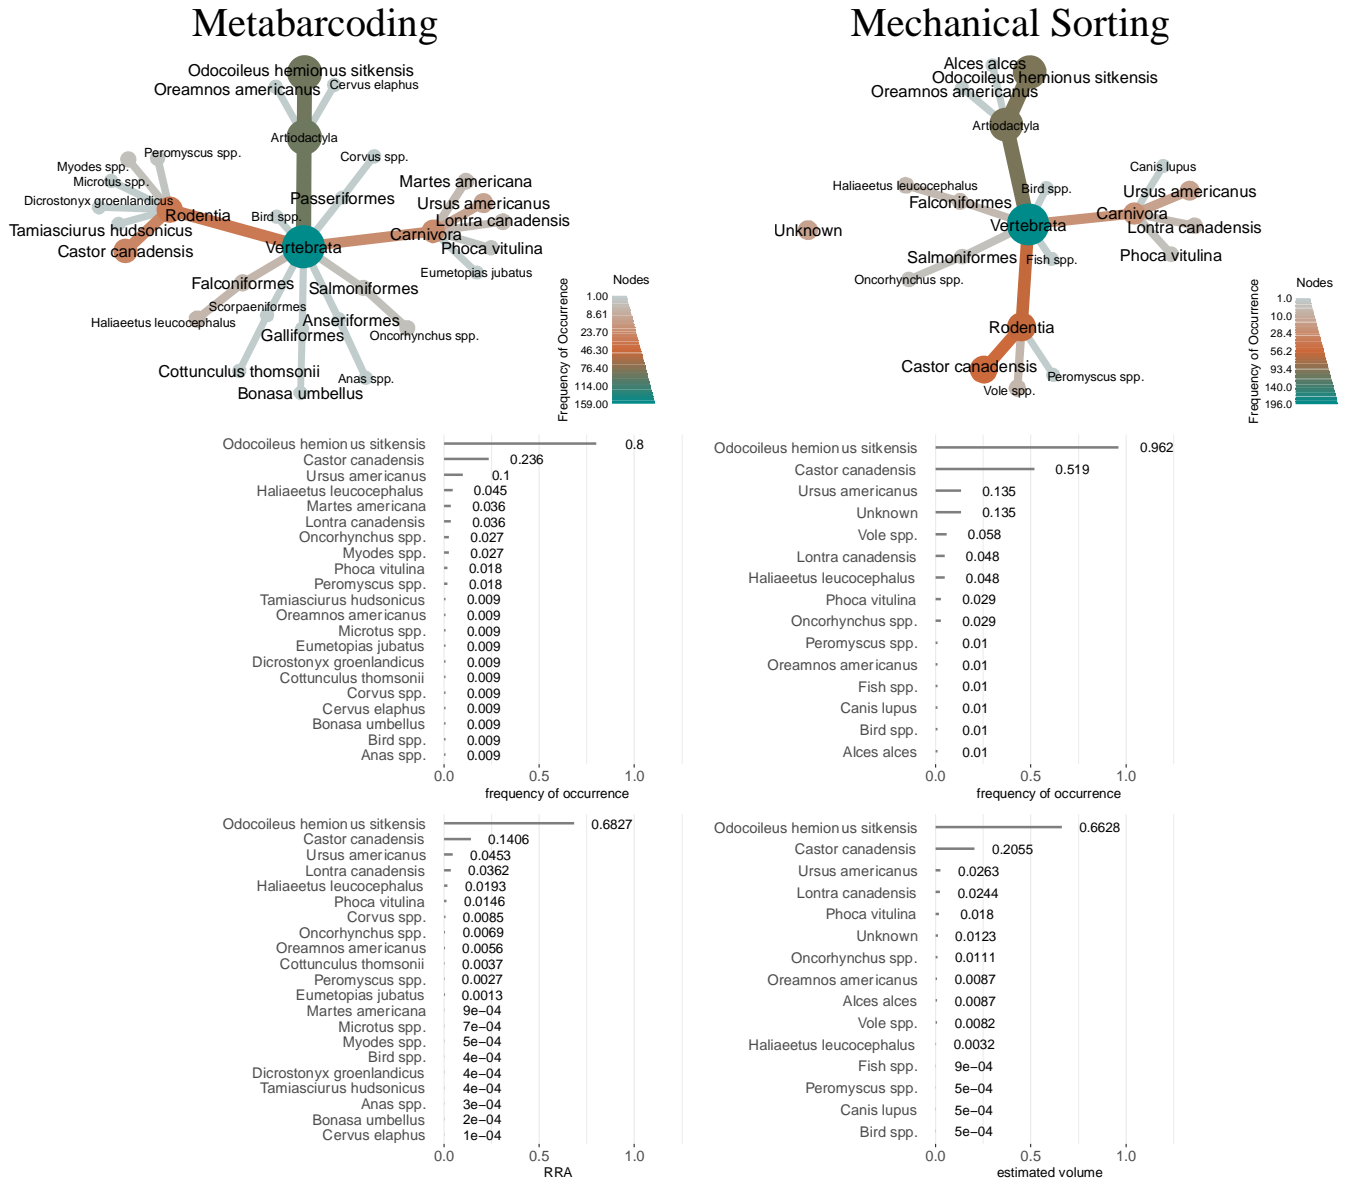

708

709

710

711

712

713

714 **Figure 6**

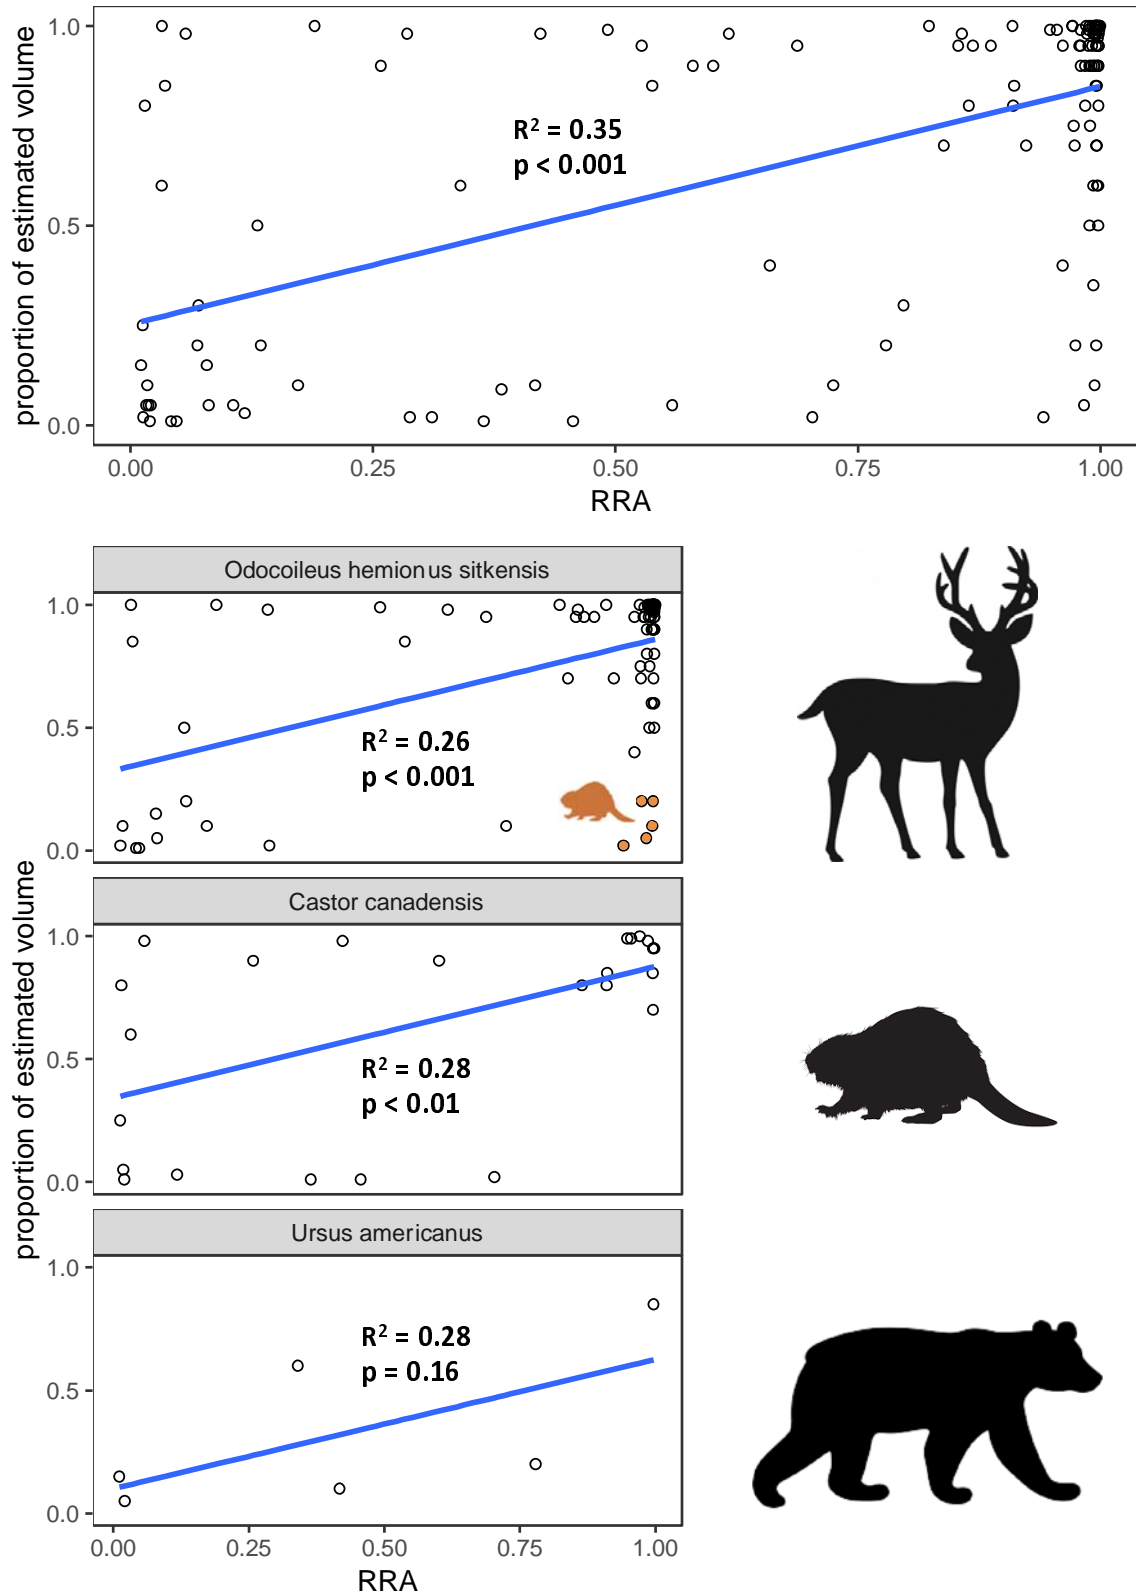

715

716 **Figure 7**

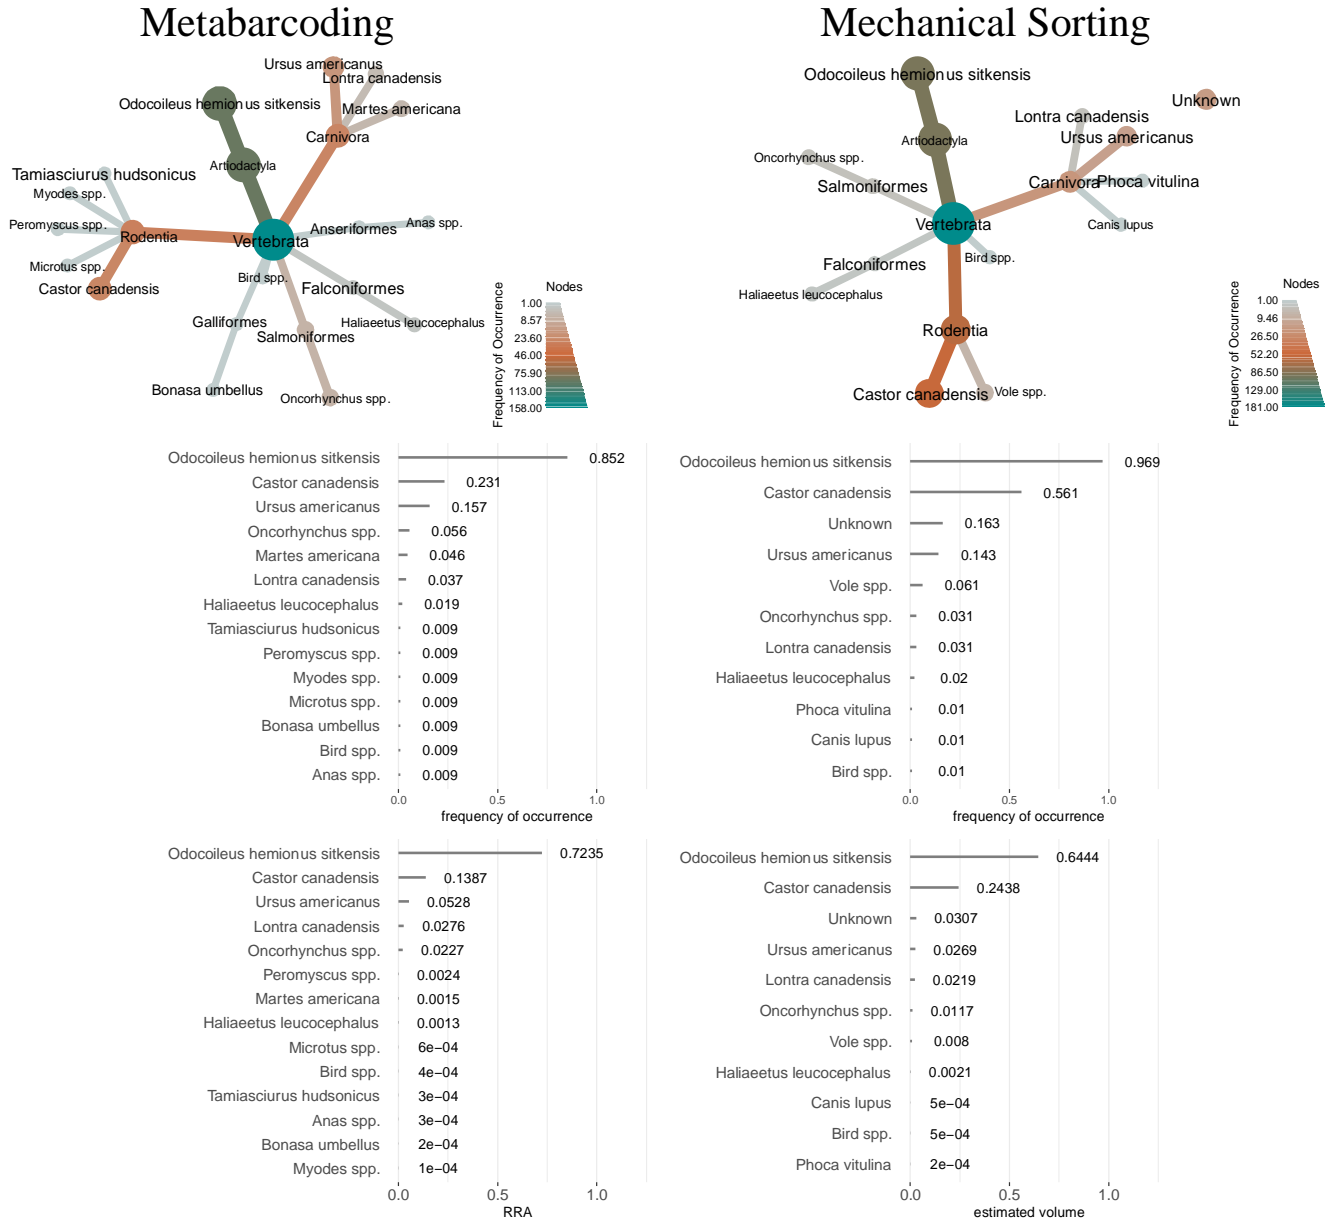

717

718

719

720

721

722

723 **Figure 8**

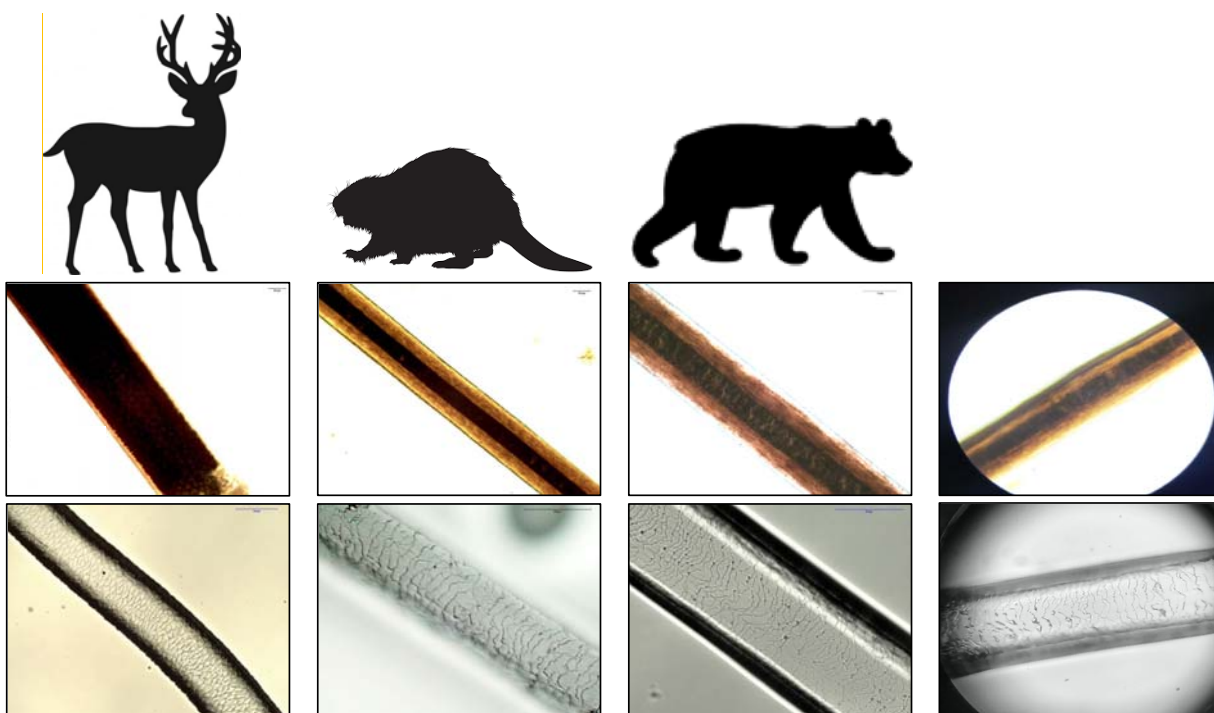

724

725

726
